# Supplementary material for: Synthesis and photophysical evaluation of a pyridinium 4-amino-1,8-naphthalimide derivative that upon intercalation displays preference for AT-rich double-stranded DNA
Source: Royal Society of Chemistry journal article supplement (doi:10.1039/c2ob06898b), 2012-01-01
Supplement: c2ob06898b.pdf [file c2ob06898b.pdf]

## Synthesis and photophysical evaluation of a pyridinium 4-amino-1,8-naphthalimide derivative that upon intercalation displays preference for AT-rich double stranded DNA

Swagata Banerjee, Jonathan A Kitchen, Thorfinnur Gunnlaugsson\* and John M. Kelly\*

The association constant,  $K$  for the binding of mononucleotide 5'-monophosphate with **1** was determined from the slope of Scatchard plot using the equation 1.<sup>1</sup>

$$\frac{\Delta A}{[NI][XMP]} = K\Delta\epsilon - K \frac{\Delta A}{[NI]} \quad (1)$$

$\Delta A$  is the change in absorbance of **1** at 435 nm in the presence of mononucleotide XMP,  $\Delta\epsilon = (\epsilon_f - \epsilon_b)$ .  $\epsilon_f$  and  $\epsilon_b$  are the molar extinction coefficients of free and bound naphthalimide, respectively.  $[NI]$ ,  $[XMP]$  refer to the total concentration of naphthalimide and mononucleotide respectively.

The binding constant for the association of **1** with GMP was also determined assuming 1:1 complex formation using equation 2.<sup>2</sup>

$$\frac{\Delta A}{[NI]} = \frac{K\Delta\epsilon[GMP]}{1 + K[GMP]} \quad (2)$$

The binding constant for the association of **1** with AMP was estimated from equation 3 assuming both 1:1 and 1:2 complex formations.<sup>3</sup>

$$\frac{\Delta A}{[NI]} = \frac{K_1\Delta\epsilon_1[AMP] + K_1K_2\Delta\epsilon_2[AMP]^2}{1 + K_1[AMP] + K_1K_2[AMP]^2} \quad (3)$$

The absorbance change at 435 nm was analysed and fitted to the noncooperative model of McGhee and von Hippel described in equation 4 using the non-linear curve fitting algorithm in OriginPro 8 software to determine the binding constant,  $K$ , where  $r$  is the binding density and given by  $r = C_b/\text{total DNA concentration}$  and  $n$  is the average no of occupied sites,  $C_f$  and  $C_b$  are the concentrations of free and bound ligand, respectively.<sup>4</sup>

$$= K(1 - nr) \left[ \frac{1 - nr}{1 - (n-1)r} \right]^{n-1} \quad (4)$$

$C_b$  and  $C_f$  were calculated from the absorbance data using the equations 5 and 6, respectively.

(5)

$$C_b = \frac{A_f - A}{A_f - A_b} \quad (6)$$

$$C_f = C - C_b$$

$A_f$  and  $A_b$  are the absorbance values corresponding to free and fully bound ligand.  $A$  is the absorbance of the mixture at any point during titration and  $C$  is the total ligand concentration.

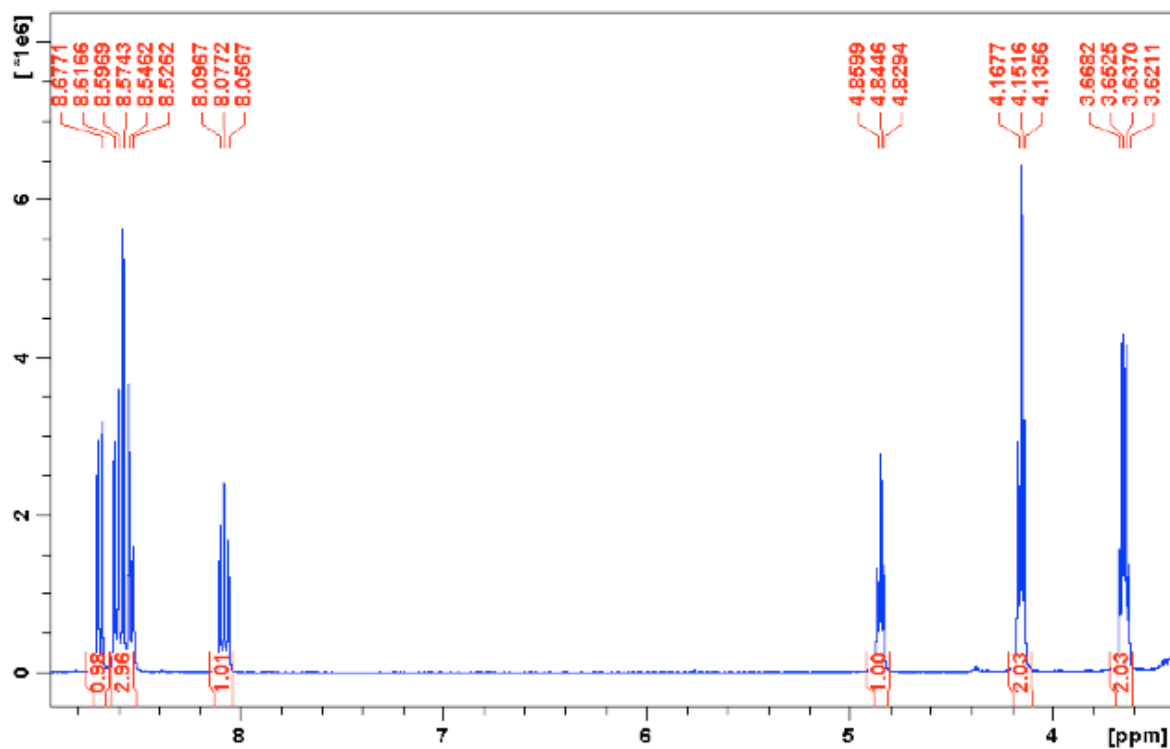

Figure ESI 1A:  $^1\text{H-NMR}$  of **3** in DMSO- $d_6$  (400 MHz)

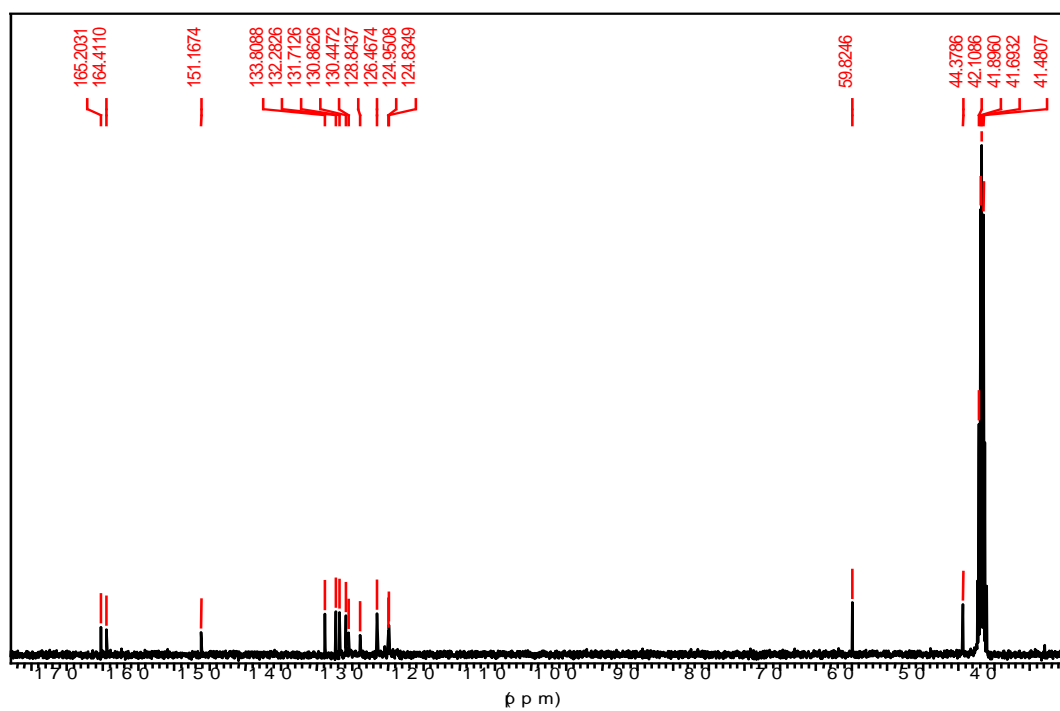

Figure ESI 1B:  $^{13}\text{C-NMR}$  of **3** in DMSO- $d_6$  (400 MHz)

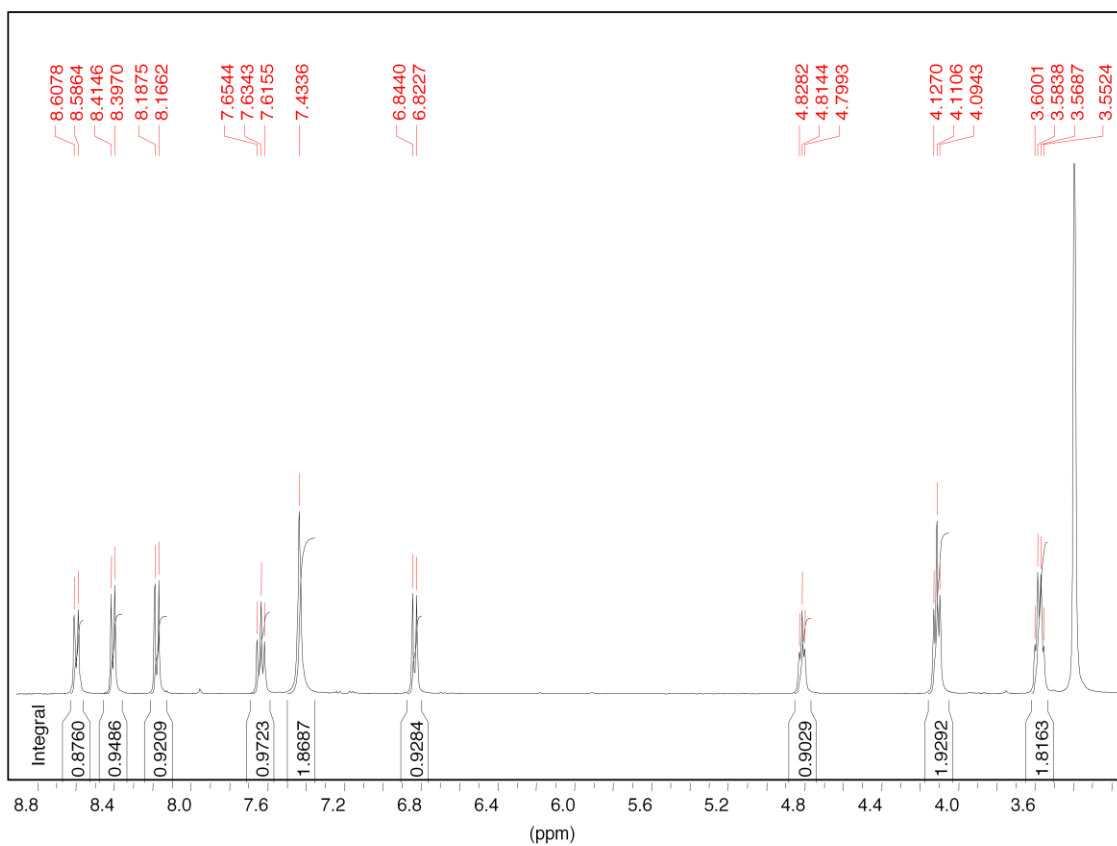

**Figure ESI 1C: <sup>1</sup>H-NMR of 4 in DMSO-d<sub>6</sub> (400 MHz)**

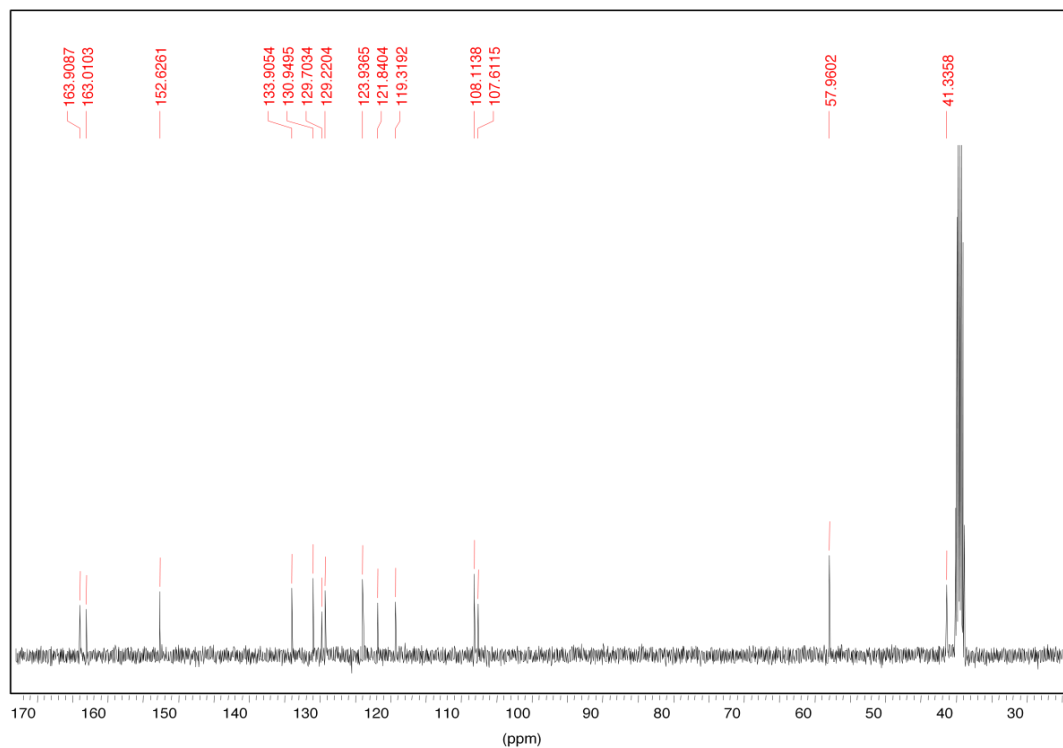

Figure ESI 1D:  $^{13}\text{C}$ -NMR of **4** in DMSO-d<sub>6</sub> (400 MHz)

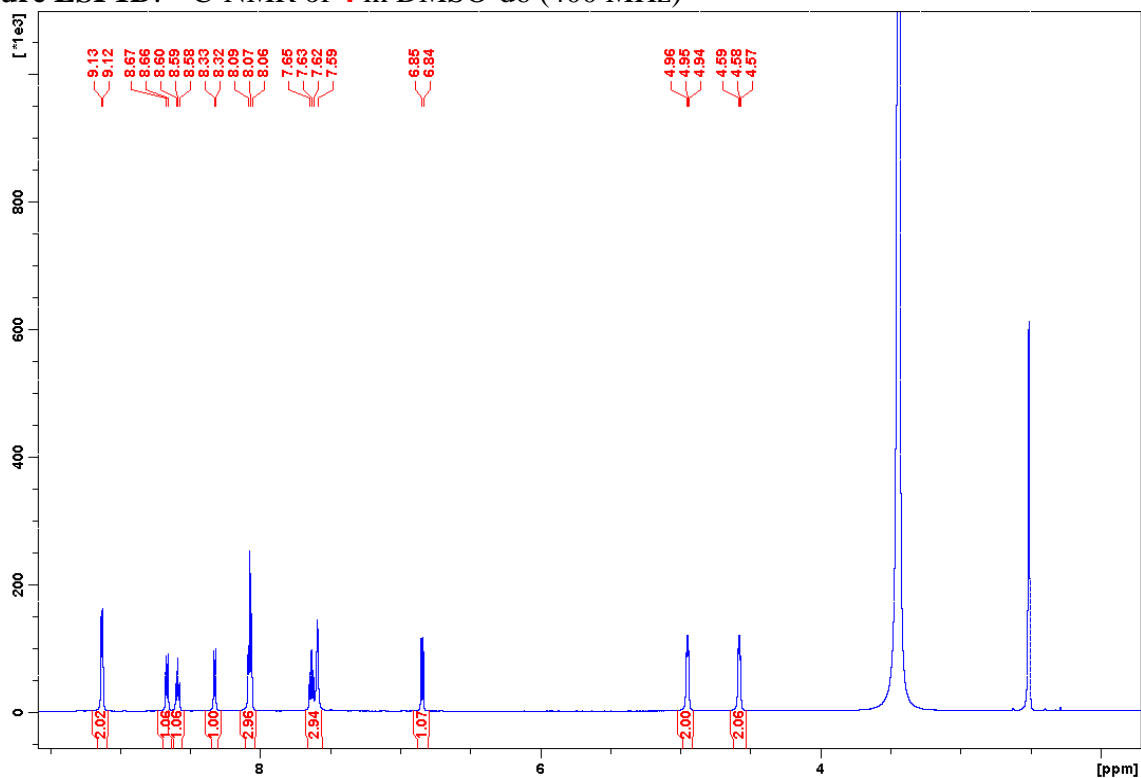

Figure ESI 1E:  $^1\text{H}$ -NMR of **1** in DMSO-d<sub>6</sub> (600 MHz)

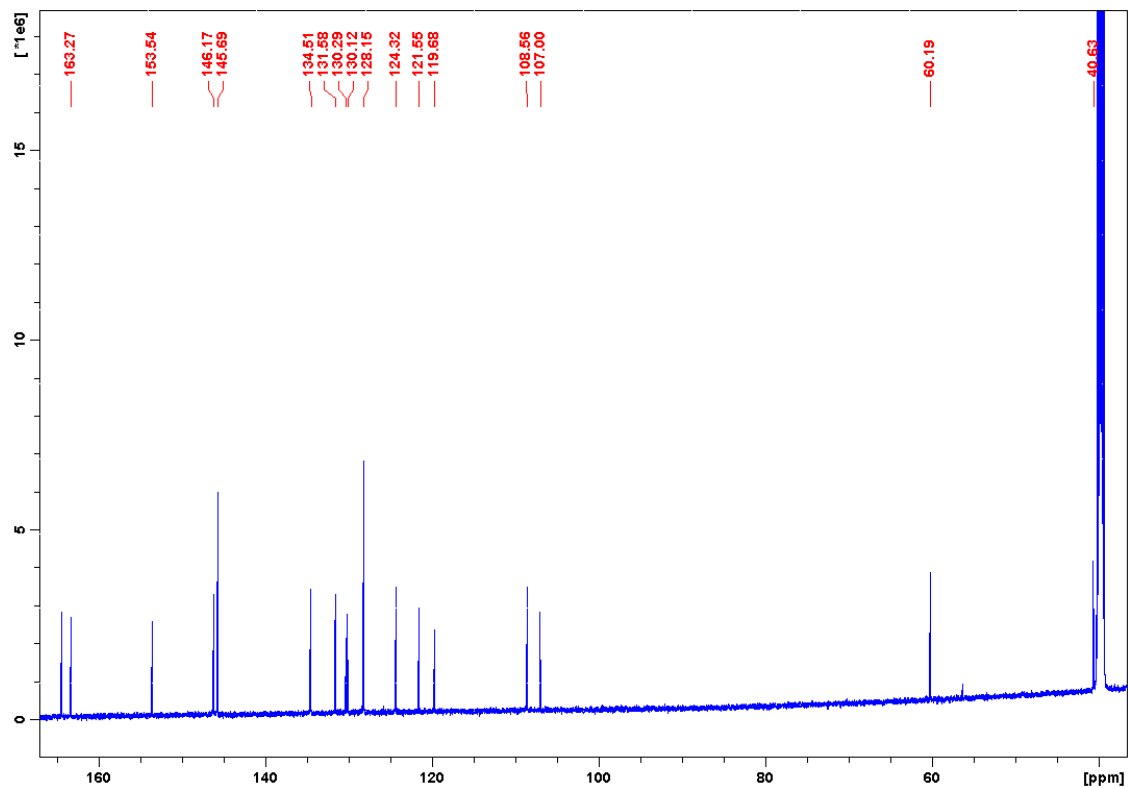

**Figure ESI 1F:** <sup>13</sup>C NMR of **1** in DMSO-d<sub>6</sub> (150 MHz)

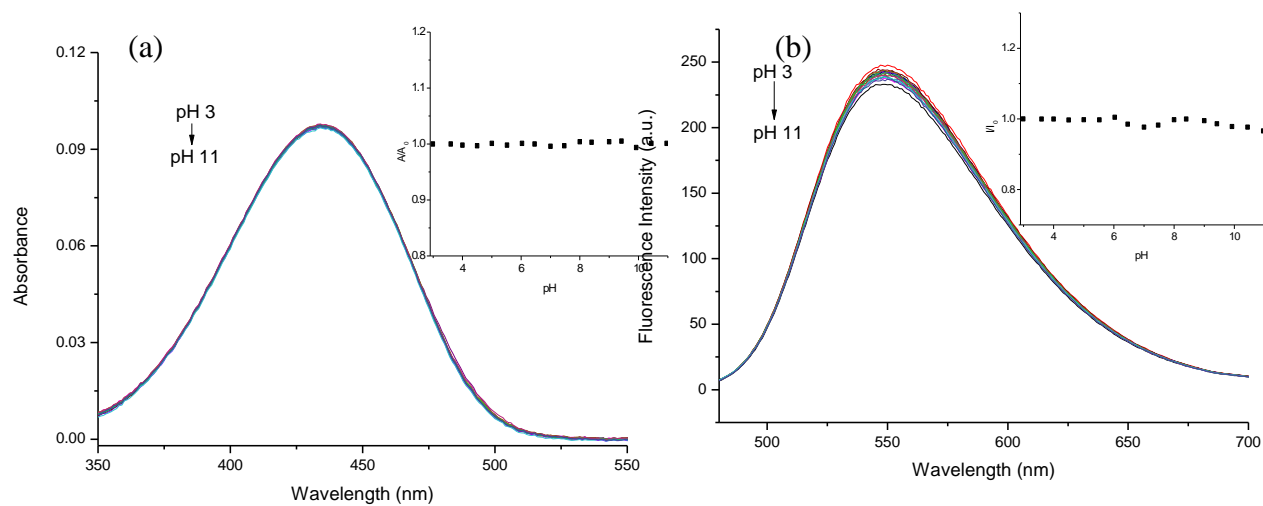

**Figure ESI 2:** (a) UV/vis absorption and (b) emission of **1** in water containing 10 mM NaCl as a function of pH. Insets: Normalised absorbance or fluorescence intensity as a function of pH

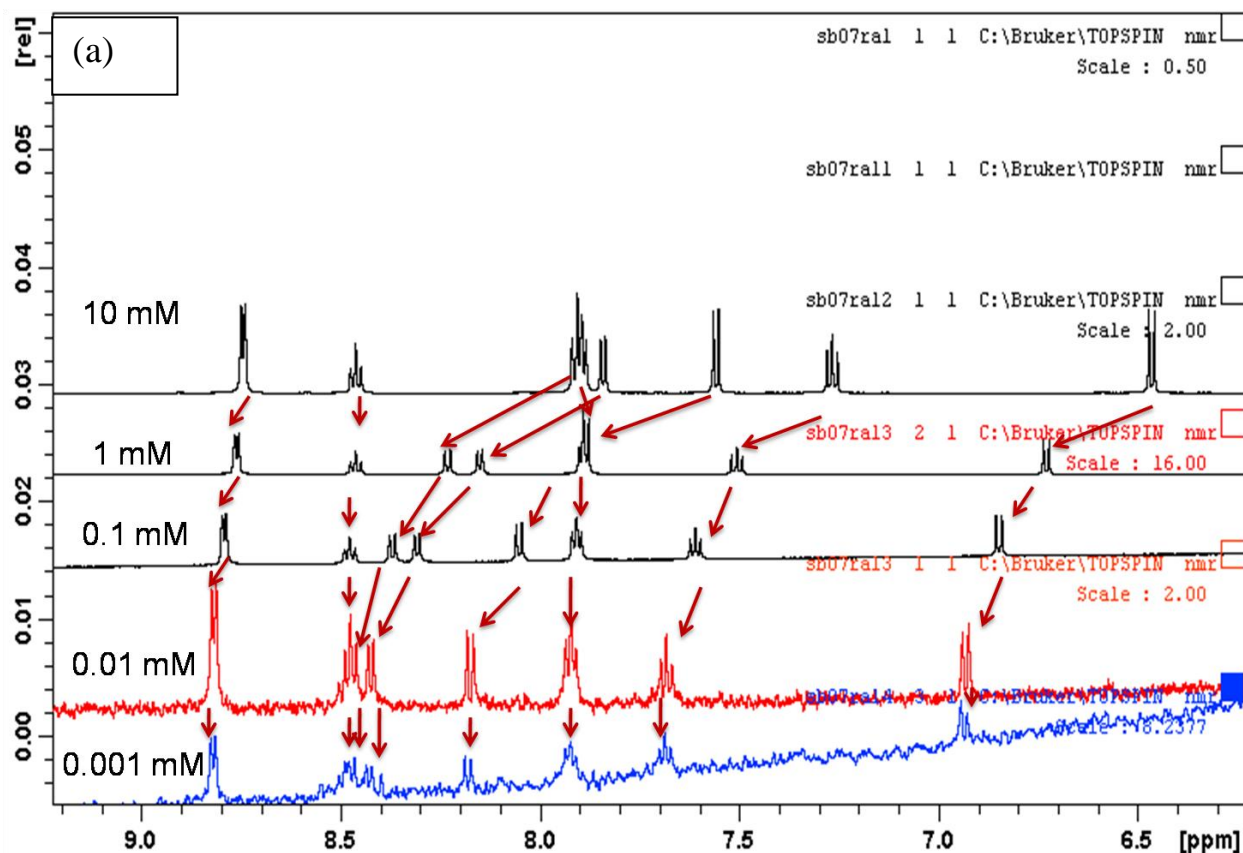

**Figure ESI 3:** (a) Overlaid  $^1\text{H-NMR}$  spectra of **1** in  $\text{D}_2\text{O}$  (600 MHz) at various concentrations;

(b)

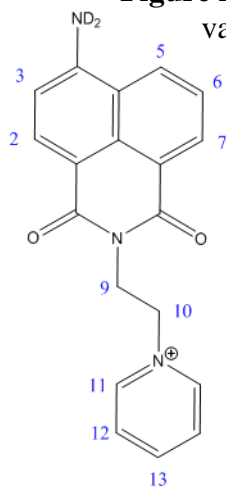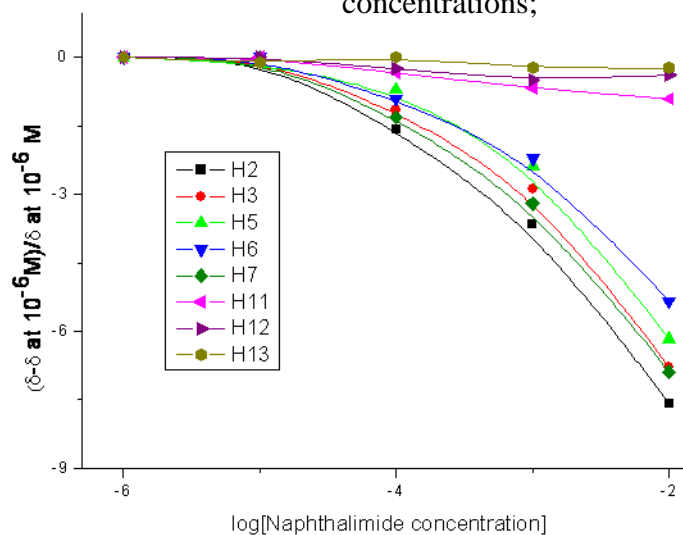

(b) Plot of chemical shift ( $\delta$ ) vs.  $\log(\text{naphthalimide concentration})$  (Assuming no aggregation at 0.001 M, chemical shift for each proton has been normalized using the equation  $(\delta - \delta \text{ at } 0.001 \text{ M}) / \delta \text{ at } 0.001 \text{ M}$ )

| H  | $\delta$ in 10 mM | $\delta$ in 1 mM | $\delta$ in 0.1 mM | $\delta$ in 0.01 mM | $\delta$ in 0.001 mM |
|----|-------------------|------------------|--------------------|---------------------|----------------------|
| 2  | 7.56              | 7.88             | 8.05               | 8.18                | 8.18                 |
| 3  | 6.46              | 6.72             | 6.85               | 6.93                | 6.93                 |
| 5  | 7.91              | 8.23             | 8.37               | 8.42                | 8.43                 |
| 6  | 7.26              | 7.50             | 7.61               | 7.68                | 7.68                 |
| 7  | 7.84              | 8.14             | 8.31               | 8.42                | 8.42                 |
| 9  | 4.43              | 4.59             | -                  | -                   | -                    |
| 10 | 4.80              | 4.88             | -                  | -                   | -                    |
| 11 | 8.74              | 8.76             | 8.79               | 8.82                | 8.82                 |
| 12 | 7.89              | 7.88             | 7.90               | 7.92                | 7.92                 |
| 13 | 8.46              | 8.46             | 8.48               | 8.47                | 8.48                 |

Table 1: Summary of chemical shifts at various concentration of **1**

|                                   |                                                                                |                             |
|-----------------------------------|--------------------------------------------------------------------------------|-----------------------------|
| Identification code               | sb07                                                                           |                             |
| Empirical formula                 | C <sub>19</sub> H <sub>16</sub> F <sub>6</sub> N <sub>3</sub> O <sub>2</sub> P |                             |
| Formula weight                    | 463.32                                                                         |                             |
| Temperature                       | 112(2) K                                                                       |                             |
| Wavelength                        | 0.71073 Å                                                                      |                             |
| Crystal system                    | Monoclinic                                                                     |                             |
| Space group                       | P2(1)/c                                                                        |                             |
| Unit cell dimensions              | a = 9.4536(19) Å                                                               | $\alpha = 90^\circ$ .       |
|                                   | b = 9.3865(19) Å                                                               | $\beta = 100.03(3)^\circ$ . |
|                                   | c = 21.293(4) Å                                                                | $\gamma = 90^\circ$ .       |
| Volume                            | 1860.6(7) Å <sup>3</sup>                                                       |                             |
| Z                                 | 4                                                                              |                             |
| Density (calculated)              | 1.654 Mg/m <sup>3</sup>                                                        |                             |
| Absorption coefficient            | 0.230 mm <sup>-1</sup>                                                         |                             |
| F(000)                            | 944                                                                            |                             |
| Crystal size                      | 0.63 x 0.44 x 0.43 mm <sup>3</sup>                                             |                             |
| Theta range for data collection   | 2.19 to 25.00°.                                                                |                             |
| Index ranges                      | -11 ≤ h ≤ 10, -7 ≤ k ≤ 11, -16 ≤ l ≤ 25                                        |                             |
| Reflections collected             | 6793                                                                           |                             |
| Independent reflections           | 3184 [R(int) = 0.0428]                                                         |                             |
| Completeness to theta = 25.00°    | 97.2 %                                                                         |                             |
| Absorption correction             | Semi-empirical from equivalents                                                |                             |
| Max. and min. transmission        | 1.0000 and 0.5575                                                              |                             |
| Refinement method                 | Full-matrix least-squares on F <sup>2</sup>                                    |                             |
| Data / restraints / parameters    | 3184 / 0 / 282                                                                 |                             |
| Goodness-of-fit on F <sup>2</sup> | 1.085                                                                          |                             |
| Final R indices [I > 2σ(I)]       | R1 = 0.0548, wR2 = 0.1447                                                      |                             |
| R indices (all data)              | R1 = 0.0600, wR2 = 0.1512                                                      |                             |
| Largest diff. peak and hole       | 0.721 and -0.408 e.Å <sup>-3</sup>                                             |                             |

Table 2. Crystal data and structure refinement for **1**.

## References

1. G. Scatchard, *Proc. New York Acad. Sci.*, 1949,**51**, 660
2. D. A. Deranleau, *J.Am. Chem. Soc.* 1969,**91**, 4044.
3. D. A. Deranleau, *J.Am. Chem. Soc.* 1969,**91**, 4050.
4. J. D. McGhee and P.H. von Hippel, *J.Mol.Biol.* 1974, **86**, 469.
